# Supplementary material
Source: PubMed Central journal article supplement (PMC5454779)
Supplement: NIHMS280299-supplement-1_si_001.pdf [file NIHMS280299-supplement-1_si_001.pdf]

Supporting Information for

“Redesigned WW Domain Peptide Employed as an OB-fold Mimic for Selective Recognition of ssDNA”

Amanda L. Stewart, Jessica H. Park, and Marcey L. Waters\*

- Page S1.** **Figure S1.** Molar variation plot for Mutant 1 binding ssDNA  
**Page S2.** **Figure S2.** Molar variation plot for Mut1-S23 binding ssDNA  
**Figure S3.** Fluorescence titrations of Mutant 1 and WKWK with ssDNA  
**Page S3.** **Figure S4.** Fluorescence titrations of WW Domain Mutants with ssDNA  
**Figure S5.** Fluorescence titrations of WW Domain Mutants with dsDNA  
**Page S4.** **Figure S6.** Fluorescence titrations of Mut1 and Mut1controls with ssDNA  
**Figure S7.** Fluorescence titrations of Mutant 1 with ssDNA and dsDNA by the fluorescence quenching method  
**Page S5.** **Figure S8.** CD wavelength data for polyproline helix  
**Figure S9.** CD wavelength data for Mut1-S1, Mut1-S2, and Mut1-S3  
**Figure S10.** Thermal renaturation of Mut1.  
**Page S6.** **Figure S11.** Long-range NOEs for Mut1  
**Figure S12.** Peak widths for representative peaks at 212  $\mu\text{M}$ , 500  $\mu\text{M}$ , 1000  $\mu\text{M}$ , and 1317  $\mu\text{M}$ .  
**Pages S7-10.** **Tables S1-S8.** NMR chemical shift assignments for all peptides

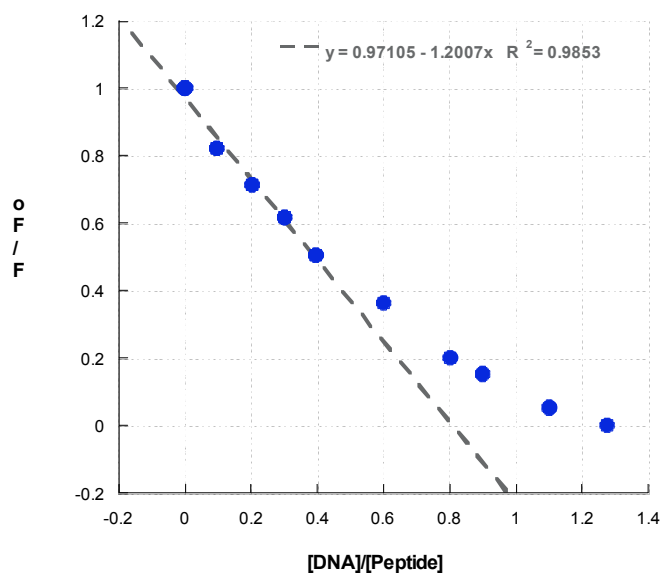

**Figure S1.** Molar variation plot for WW domain Mut1 (50  $\mu\text{M}$ ) binding to ssDNA sequence 5'-CCATCGCTACC-3' (Figure 3m; 0-60  $\mu\text{M}$ ). A 1:1 binding interaction was demonstrated with the average of two runs in 10 mM  $\text{Na}_2\text{HPO}_4$ , 100 mM NaCl, pH 7.0.

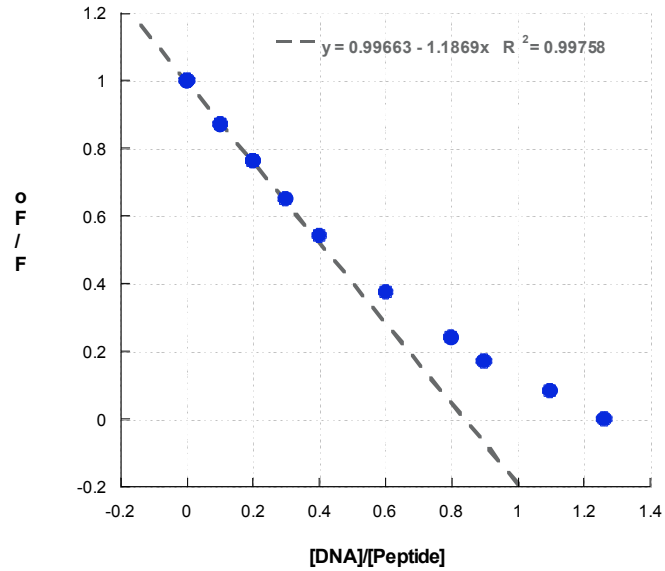

**Figure S2.** Molar variation plot for WW domain Mutant 1 Strands 2&3 (50  $\mu\text{M}$ ) binding to ssDNA sequence 5'-CCATCGCTACC-3' (Figure 3m; 0-60  $\mu\text{M}$ ). A 1:1 binding interaction was demonstrated with the average of two runs in 10 mM  $\text{Na}_2\text{HPO}_4$ , 100 mM NaCl, pH 7.0.

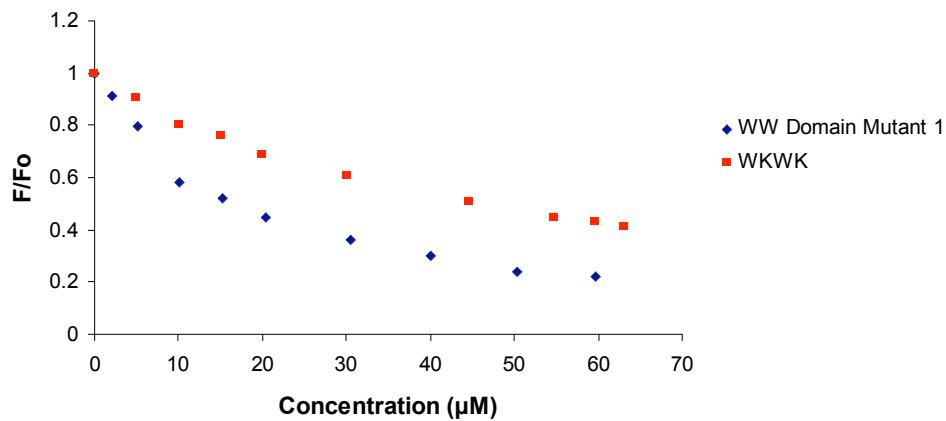

**FigureS3.** Fluorescence titrations of WW domain Mutant 1 and WKWK with single-stranded DNA sequence 5'-CCATCGCTACC-3' (Figure 3m) corrected for the inner filter effect (see Experimental Section); 3-5  $\mu\text{M}$  peptide, 10 mM sodium phosphate buffer, 100 mM NaCl, pH 7.0, 25  $^{\circ}\text{C}$ .

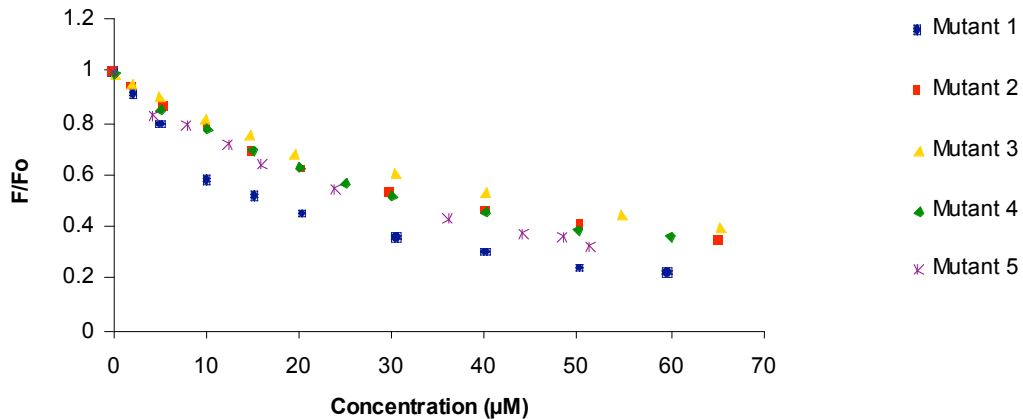

**Figure S4.** Fluorescence titrations of WW domain mutants with single-stranded DNA sequence 5'-CCATCGCTACC-3' (Figure 3m) corrected for the inner filter effect (see Experimental Section); 5-8  $\mu$ M peptide, 10 mM sodium phosphate buffer, 100 mM NaCl, pH 7.0, 25  $^{\circ}$ C.

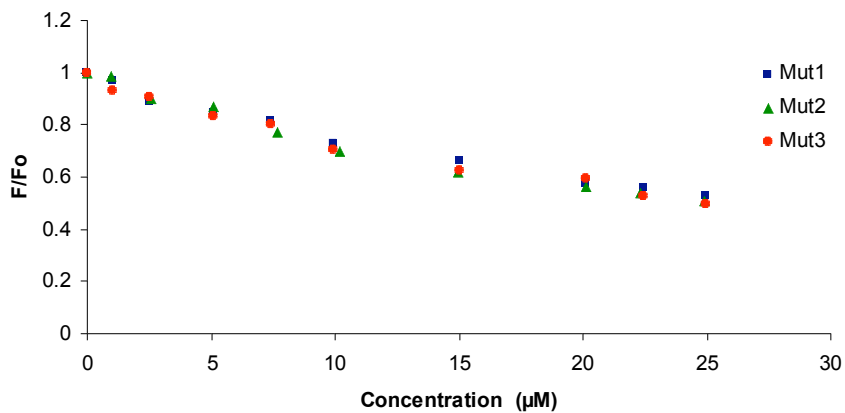

**Figure S5.** Fluorescence titrations of WW domain mutants with duplex DNA sequence (Figure 3n) corrected for the inner filter effect (see Experimental Section); 5-8  $\mu$ M peptide, 10 mM sodium phosphate buffer, 100 mM NaCl, pH 7.0, 25  $^{\circ}$ C.

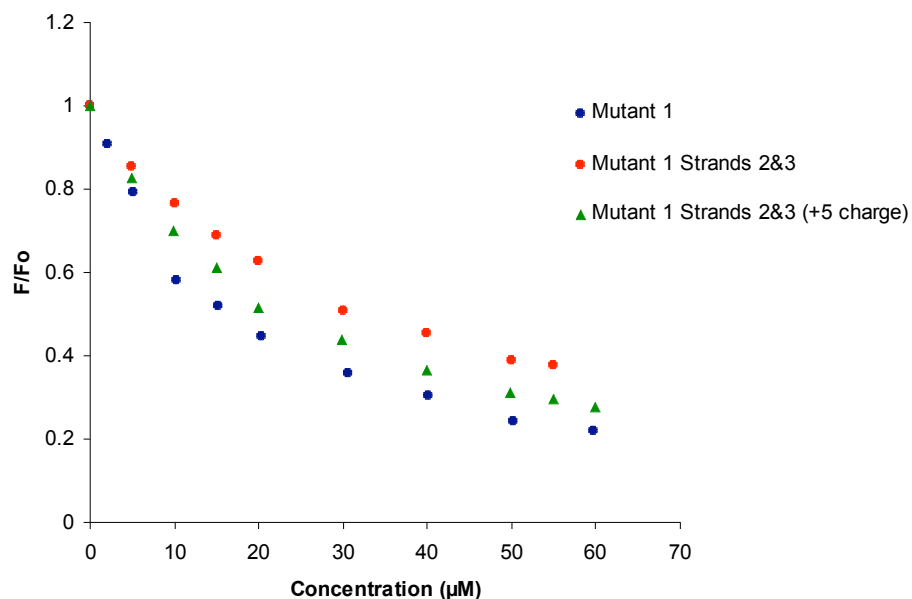

**Figure S6.** Fluorescence titrations of WW domain Mutant 1, Mut1-S23, and Mut1-S23 (+5 charge) with single-stranded DNA sequence 5'-CCATCGCTACC-3' (Figure 3m) corrected for the inner filter effect (see Experimental Section); 5  $\mu\text{M}$  peptide, 10 mM sodium phosphate buffer, 100 mM NaCl, pH 7.0, 25  $^{\circ}\text{C}$ .

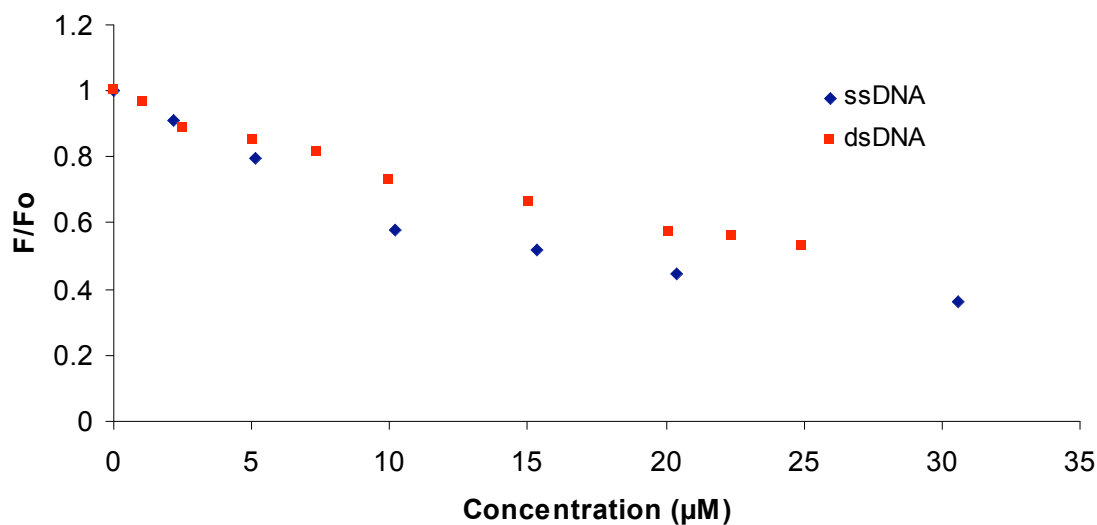

**Figure S7.** Fluorescence titrations of WW domain Mutant 1 with ssDNA (Figure 3m) and duplex DNA (Figure 3n) by the Trp quenching method, corrected for the inner filter effect (see Experimental Section); 5  $\mu\text{M}$  peptide, 10 mM sodium phosphate buffer, 100 mM NaCl, pH 7.0, 25  $^{\circ}\text{C}$ .

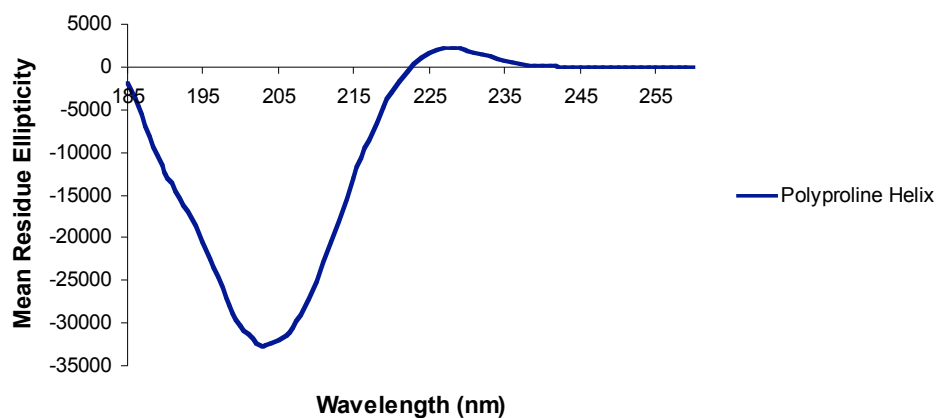

**Figure S8.** CD spectrum for polyproline helix. Conditions: 75  $\mu$ M, pH 7, 25°C.

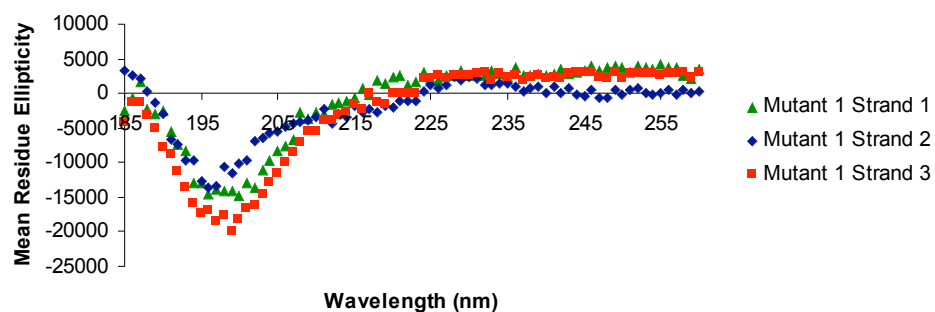

**Figure S9.** CD spectra for control peptides Mut1-S1, Mut1-S2, and Mut1-S3. Conditions: 30  $\mu$ M, pH 7, 25°C.

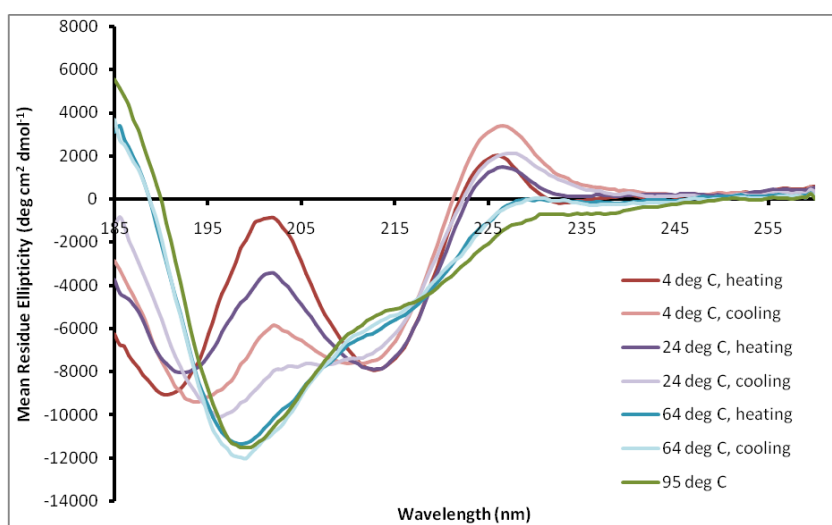

**Figure S10.** Thermal denaturation and renaturation CD spectra of Mut1 at 4, 24, 64, 95°C. Data were recorded at 30  $\mu$ M peptide in 10 mM  $\text{Na}_2\text{HPO}_4$ , pH 7.0.

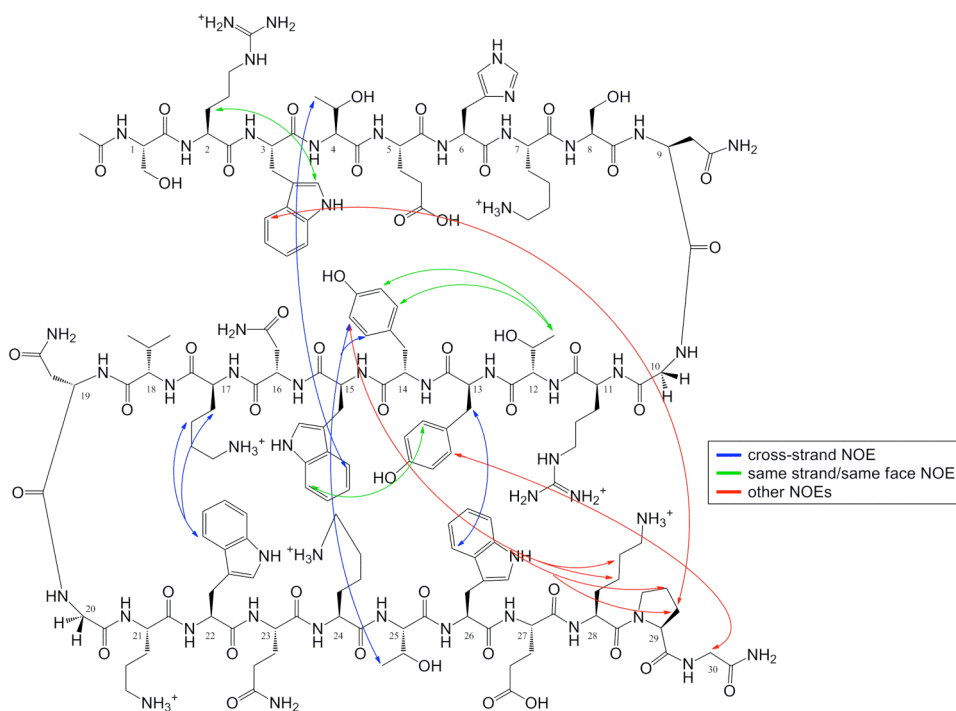

**Figure S11.** Long-range NOEs for Mut 1.

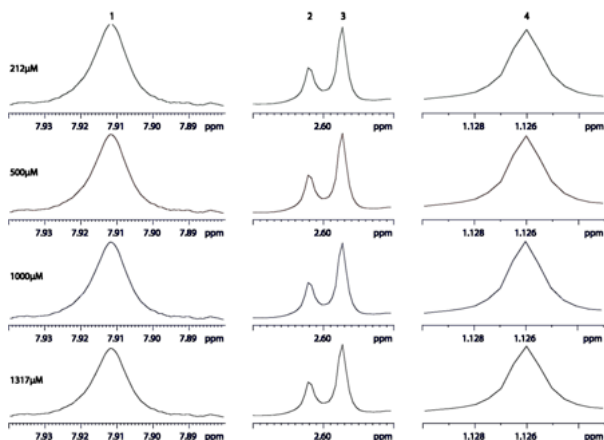

|                       | Peak Width, Hz     |                    |                    |                    |
|-----------------------|--------------------|--------------------|--------------------|--------------------|
| [Mut1], $\mu\text{M}$ | Peak 1 (7.912 ppm) | Peak 2 (2.602 ppm) | Peak 3 (2.597 ppm) | Peak 4 (1.126 ppm) |
| 212                   | 6.30               | 1.14               | 0.96               | 0.93               |
| 500                   | 6.24               | 1.14               | 0.96               | 0.93               |
| 1000                  | 6.24               | 1.14               | 0.96               | 0.93               |
| 1317                  | 6.24               | 1.14               | 0.96               | 0.93               |

**Figure S12.** Peak widths for representative peaks at 212  $\mu\text{M}$ , 500  $\mu\text{M}$ , 1000  $\mu\text{M}$ , and 1317  $\mu\text{M}$ .

**Table S1.** Proton chemical shifts (in ppm) of WW Domain Mut 1 in 50 mM KD<sub>2</sub>PO<sub>4</sub> buffer, pH 7.0

| Residue | $\alpha$ | $\beta$        | $\gamma$       | $\delta$ | $\epsilon$ |
|---------|----------|----------------|----------------|----------|------------|
| Ser     | 4.4315   | 3.821          |                |          |            |
| Arg     | 4.3218   | 1.9763, 1.8866 | 1.5974         | 2.1359   |            |
| Trp     | 4.6857   | 3.3025, 3.237  |                |          |            |
| Thr     | 4.4265   | 2.7541         |                |          |            |
| Glu     | 4.3660   | 1.9265         | 2.2655         |          |            |
| His     | 4.6010   | 3.2726         |                |          |            |
| Lys     | 4.3000   | 1.5500         | 1.1500         | 1.2900   | 2.9100     |
| Ser     | 4.4813   | 3.8908         |                |          |            |
| Asn     | 4.6209   | 2.9335, 2.5945 |                |          |            |
| Gly     | 0.26*    |                |                |          |            |
| Arg     | 4.6807   | 1.9265         | 1.721          | 2.9136   |            |
| Thr     | 4.6059   | 4.0303         | 0.9992         |          |            |
| Tyr     | 4.6558   | 2.9535, 2.8637 |                |          |            |
| Tyr     | 4.9400   | 3.3424, 2.7940 |                |          |            |
| Trp     | 4.9300   | 3.3424, 3.2327 |                |          |            |
| Asn     | 5.2192   | 2.7541, 2.5646 |                |          |            |
| Lys     | 4.5500   | 1.8200         |                | 1.5900   |            |
| Val     | 4.0825   | 1.8866         | 0.8795         |          |            |
| Asn     | 4.4215   | 3.0233, 2.7451 |                |          |            |
| Gly     | 0.68*    |                |                |          |            |
| Orn     | 4.6458   | 1.757, 1.6174  | 1.3482         | 2.8737   |            |
| Trp     | 4.9450   | 3.3922, 3.1330 |                |          |            |
| Gln     | 4.9101   | 2.2057, 1.9963 | 2.3851         |          |            |
| Lys     | 4.1500   | 1.660          | 0.735          | 0.475    |            |
| Thr     | 4.5361   | 3.9705         | 1.1886         |          |            |
| Trp     | 4.8602   | 3.1728, 3.0632 |                |          |            |
| Glu     | 4.2919   | 1.7869         | 2.1758         |          |            |
| Lys     | 4.2700   | 1.7830         | 0.4500         | 0.1600   | 2.182      |
| Pro     | 4.3966   | 2.1857         | 1.9664, 1.8567 |          |            |
| Gly     | 3.8900   |                |                |          |            |

\*Glycine splitting values, not chemical shifts

**Table S2.** Alpha proton chemical shift assignments (in ppm) for random coil peptide Strand 1 Ac-Ser-Arg-Trp-Thr-Glu-His-Lys-Ser-Asn-Gly-NH<sub>2</sub>

| <b>Residue</b> | <b><math>\alpha</math></b> |
|----------------|----------------------------|
| Ser            | 4.38                       |
| Arg            | 4.28                       |
| Trp            | 4.72                       |
| Thr            | 4.19                       |
| Glu            | 4.12                       |
| His            | 4.62                       |
| Lys            | 4.32                       |
| Ser            | 4.42                       |
| Asn            | 4.72                       |
| Gly            | 3.89                       |

**Table S3.** Alpha proton chemical shift assignments (in ppm) for random coil peptide Strand 2 Ac-Gly-Arg-Thr-Tyr-Tyr-Trp-Asn-Lys-Val-Asn-Gly-NH<sub>2</sub><sup>a</sup>

| <b>Residue</b> | <b><math>\alpha</math></b> |
|----------------|----------------------------|
| Gly            | 3.85                       |
| Arg            | 4.33                       |
| Thr            | 4.20                       |
| Tyr            | 4.40                       |
| Tyr            | 4.51                       |
| Trp            | 4.51                       |
| Asn            | 4.66                       |
| Lys            | 4.15                       |
| Val            | 4.02                       |
| Asn            | 4.40                       |
| Gly            | 3.91                       |

<sup>a</sup>Tyrosine residues could not be definitively distinguished.

**Table S4.** Alpha proton chemical shift assignments (in ppm) for random coil peptide Strand 3 Ac-Asn-Gly-Orn-Trp-Gln-Lys-Thr-Trp-Glu-Lys-Pro-Gly-NH<sub>2</sub>

| <b>Residue</b> | <b><math>\alpha</math></b> |
|----------------|----------------------------|
| Asn            | 4.65                       |
| Gly            | 3.91                       |
| Orn            | 4.37                       |
| Trp            | 4.65                       |
| Gln            | 4.20                       |
| Lys            | 4.27                       |
| Thr            | 4.20                       |
| Trp            | 4.60                       |
| Glu            | 4.14                       |
| Lys            | 4.08                       |
| Pro            | 4.37                       |
| Gly            | 3.86                       |



**Table S5.** Alpha proton chemical shift assignments (in ppm) for Mut1-S12 Ac-Ser-Arg-Trp-Thr-Glu-His-Lys-Ser-Asn-Gly-Arg-Thr-Tyr-Tyr-Trp-Asn-Lys-Val-NH<sub>2</sub>

| <b>Residue</b> | <b><math>\alpha</math></b> | <b><math>\beta</math></b> | <b><math>\gamma</math></b> | <b><math>\delta</math></b> | <b><math>\epsilon</math></b> |
|----------------|----------------------------|---------------------------|----------------------------|----------------------------|------------------------------|
| Ser            | 4.37                       | 3.76                      |                            |                            |                              |
| Arg            | 4.30                       | 1.57                      | 1.37                       | 3.00                       |                              |
| Trp            | 4.60                       | 3.18                      |                            |                            |                              |
| Thr            | 4.21                       | 4.00                      | 1.03                       |                            |                              |
| Glu            | 4.19                       | 1.89                      | 2.14                       |                            |                              |
| His            | 4.63                       | 3.02                      |                            |                            |                              |
| Lys            | 4.39                       | 1.72                      | 1.33                       | 1.63                       | 2.90                         |
| Ser            | 4.43                       | 3.84                      |                            |                            |                              |
| Asn            | 4.51                       | 2.84                      |                            |                            |                              |
| Gly            | 3.91                       |                           |                            |                            |                              |
| Arg            | 4.37                       | 1.70, 1.55                | 1.33                       | 3.06                       |                              |
| Thr            | 4.26                       | 4.01                      | 1.00                       |                            |                              |
| Tyr            | 4.47                       | 2.66                      |                            |                            |                              |
| Tyr            | 4.57                       | 2.51                      |                            |                            |                              |
| Trp            | 4.76                       | 3.21                      |                            |                            |                              |
| Asn            | 4.69                       | 2.84                      |                            |                            |                              |
| Lys            | 4.16                       | 2.13                      | 1.29                       | 1.59                       | 2.89                         |
| Val            | 4.05                       | 2.02                      | 0.92                       |                            |                              |

**Table S6.** Alpha proton chemical shift assignments (in ppm) for Mut1 S23: Ac-Gly-Arg-Thr-Tyr-Tyr-Trp-Asn-Lys-Val-Asn-Gly-Orn-Trp-Gln-Lys-Thr-Trp-Glu-Lys-Pro-Gly-NH<sub>2</sub>

| <b>Residue</b> | <b><math>\alpha</math></b> | <b><math>\beta</math></b> | <b><math>\gamma</math></b> | <b><math>\delta</math></b> | <b><math>\epsilon</math></b> |
|----------------|----------------------------|---------------------------|----------------------------|----------------------------|------------------------------|
| Gly            | 3.91                       |                           |                            |                            |                              |
| Arg            | 4.43                       | 2.21                      | 1.92                       | 3.01                       |                              |
| Thr            | 4.40                       | 4.12                      | 1.08                       |                            |                              |
| Tyr            | 4.72                       | 3.08                      |                            |                            |                              |
| Tyr            | 4.80                       | 2.85                      |                            |                            |                              |
| Trp            | 4.97                       | 3.38                      |                            |                            |                              |
| Asn            | 5.18                       | 2.82, 2.61                |                            |                            |                              |
| Lys            | 4.45                       | 1.97                      | 1.43                       | 1.68                       | 2.99                         |
| Val            | 4.10                       | 1.91                      | 0.90                       |                            |                              |
| Asn            | 4.50                       | 2.96, 2.76                |                            |                            |                              |
| Gly            | 4.12                       |                           |                            |                            |                              |
| Orn            | 4.71                       | 1.93                      | 1.75                       | 3.08                       |                              |
| Trp            | 4.95                       | 3.14                      |                            |                            |                              |
| Gln            | 4.95                       | 2.19, 2.00                | 2.35                       |                            |                              |
| Lys            | 4.43                       | 1.98                      | 1.70                       | 1.89                       | 2.76                         |
| Thr            | 4.52                       | 3.90                      | 1.16                       |                            |                              |
| Trp            | 4.98                       | 3.14                      |                            |                            |                              |
| Glu            | 4.28                       | 1.89, 1.84                | 2.15                       |                            |                              |
| Lys            | 4.10                       | 1.68                      | 1.33                       | 1.70                       | 3.10                         |
| Pro            | 4.39                       | 2.27, 2.07                | 1.93                       | 3.69, 3.50                 |                              |
| Gly            | 3.87                       |                           |                            |                            |                              |

**Table S7.** Alpha proton chemical shift assignments (in ppm) for random coil peptide Strands 1&2 Cyclic Ac-Cys-Arg-Trp-Thr-Glu-His-Lys-Ser-Asn-Gly-Arg-Thr-Tyr-Tyr-Trp-Asn-Lys-Cys-NH<sub>2</sub>

| <b>Residue</b> | <b><math>\alpha</math></b> | <b><math>\beta</math></b> | <b><math>\gamma</math></b> | <b><math>\delta</math></b> | <b><math>\epsilon</math></b> |
|----------------|----------------------------|---------------------------|----------------------------|----------------------------|------------------------------|
| Cys            | 4.53                       | 3.22, 2.56                |                            |                            |                              |
| Arg            | 4.49                       | 1.77                      | 1.59, 1.48                 | 3.14                       |                              |
| Trp            | 4.64                       | 3.22, 2.94                |                            |                            |                              |
| Thr            | 4.56                       | 3.85                      | 0.86                       |                            |                              |
| Glu            | 4.41                       | 1.91, 1.79                | 2.06                       |                            |                              |
| His            | 4.75                       | 2.96                      |                            |                            |                              |
| Lys            | 4.20                       | 1.75                      | 1.28, 1.24                 | 1.54, 1.44                 | 2.82                         |
| Ser            | 4.44                       | 3.81                      |                            |                            |                              |
| Asn            | 4.42                       | 2.86, 2.70                |                            |                            |                              |
| Gly            | 4.14                       |                           |                            |                            |                              |
| Arg            | 4.60                       | 1.72                      | 1.55                       | 3.13                       |                              |
| Thr            | 4.57                       | 3.96                      | 1.08                       |                            |                              |
| Tyr            | 4.97                       | 2.74                      |                            |                            |                              |
| Tyr            | 4.67                       | 2.43                      |                            |                            |                              |
| Trp            | 4.90                       | 3.26, 3.17                |                            |                            |                              |
| Asn            | 4.70                       | 2.84, 2.72                |                            |                            |                              |
| Lys            | 4.12                       | 1.80                      | 1.33                       | 1.66, 1.62                 | 2.91                         |
| Cys            | 4.57                       | 2.76, 2.59                |                            |                            |                              |

**Table S8.** Alpha proton chemical shift assignments (in ppm) for random coil peptide Strands 2&3 Cyclic Ac-Cys-Thr-Tyr-Tyr-Trp-Asn-Lys-Val-Asn-Gly-Orn-Trp-Gln-Lys-Thr-Trp-Glu-Cys-NH<sub>2</sub>

| <b>Residue</b> | <b><math>\alpha</math></b> | <b><math>\beta</math></b> | <b><math>\gamma</math></b> | <b><math>\delta</math></b> | <b><math>\epsilon</math></b> |
|----------------|----------------------------|---------------------------|----------------------------|----------------------------|------------------------------|
| Cys            | 5.30                       | 3.31, 2.91                |                            |                            |                              |
| Thr            | 4.54                       | 4.25                      | 1.14                       |                            |                              |
| Tyr            | 4.71                       | 2.90                      |                            |                            |                              |
| Tyr            | 4.95                       | 3.11                      |                            |                            |                              |
| Trp            | 5.05                       | 3.23                      |                            |                            |                              |
| Asn            | 5.31                       | 2.91, 2.75                |                            |                            |                              |
| Lys            | 4.41                       | 0.91                      |                            | 0.40                       | 2.31                         |
| Val            | 4.25                       | 1.98                      | 1.02                       |                            |                              |
| Asn            | 4.54                       | 3.15, 2.89                |                            |                            |                              |
| Gly            | 4.28                       |                           |                            |                            |                              |
| Orn            | 5.07                       | 2.45, 2.30                | 2.11                       | 3.02                       |                              |
| Trp            | 5.09                       | 3.03                      |                            |                            |                              |
| Gln            | 5.46                       | 2.07                      | 2.45                       |                            |                              |
| Lys            | 4.33                       | 1.30                      |                            | 0.5                        |                              |
| Thr            | 4.71                       | 3.86                      | 1.32                       |                            |                              |
| Trp            | 4.97                       | 3.33                      |                            |                            |                              |
| Glu            | 4.69                       | 1.80                      | 2.00                       |                            |                              |
| Cys            | 5.25                       | 3.12, 2.58                |                            |                            |                              |
